# Supplementary material for: Assessment of gaseous criteria pollutants in the Bangkok Metropolitan Region, Thailand
Source: Copernicus journal article supplement (doi:10.5194/acp-18-12581-2018), 2018-08-30
Supplement: Supplementary file 1 [file acp-18-12581-2018-supplement.pdf]

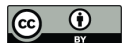

*Supplement of*

**Assessment of gaseous criteria pollutants in the Bangkok Metropolitan Region, Thailand**

**Pornpan Uttamang et al.**

*Correspondence to:* Pornpan Uttamang (puttama@ncsu.edu)

The copyright of individual parts of the supplement might differ from the CC BY 4.0 License.

# Supplement Material

## Section S1: Data Availability and Equipment Calibrations

### Data availability:

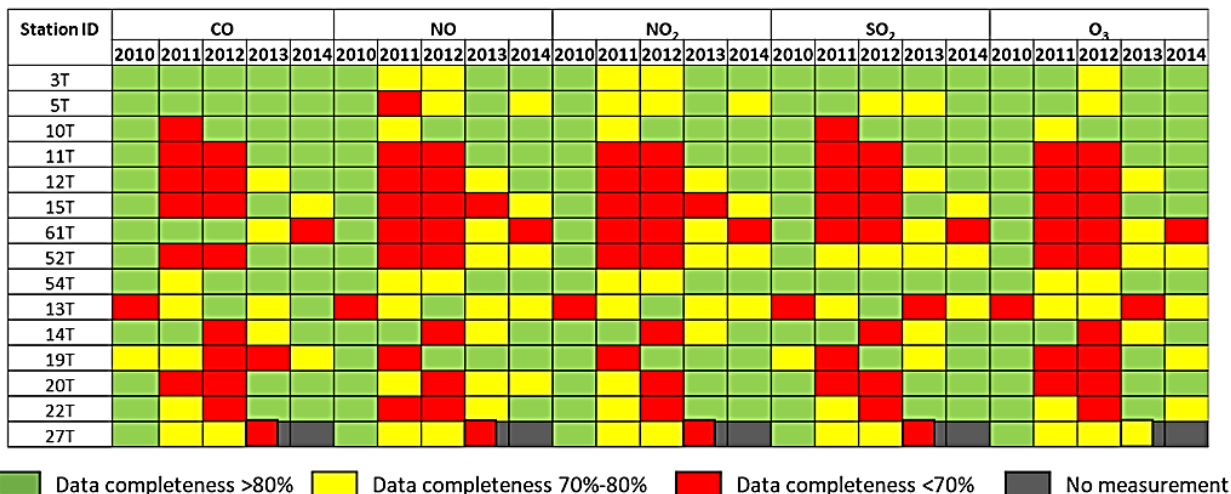

**Figure S1:** Data availability of gaseous criterial pollutant from the 15 monitoring stations during 2010 to 2014.

### Detector details:

#### SO<sub>2</sub> detectors:

range: 0-500 ppb to 0-20 ppm with auto ranging or better.  
 lower detection limit: < 1 ppb  
 precision: 0.5 ppb or < 1% of reading or better  
 zero drift: < 1 ppb/24-hour  
 span drift: < 1% of reading/ 24-hour

#### NO<sub>x</sub> detectors:

range: 0-500 ppb to 0-20 ppm with auto ranging or better.  
 lower detection limit: < 0.5 ppb  
 precision: 0.5 ppb or < 1% of reading or better  
 zero drift: < 1 ppb/24-hour  
 span drift: < 1% of full scale/ 24-hour

#### CO detectors:

range: 0-50 ppm to 0-200 ppm with auto ranging or better.  
 lower detection limit: < 0.05 ppm  
 precision: < 1% of reading or better  
 zero drift: < 0.1 ppm/24-hour  
 span drift: < 1% of reading/ 24-hour

#### O<sub>3</sub> detectors:

range: 0-500 ppb to 0-10 ppm with auto ranging or better.  
 lower detection limit: < 0.6 ppb  
 precision: 1% of reading or better  
 zero drift: < 1 ppb/24-hour  
 span drift: < 1% of reading/ 24-hour

Detector/ data loggers/ air inlets calibration/ maintenance:

single point calibration for detectors: every 15 days

multi-point calibration with 3 span levels (20 %, 40 % and 80 %): every 90 days

mass flow adjustments: every 90 days

molybdenum converter for NO<sub>2</sub> detectors: at least 4 times in 730 days

zero air generators: at least 4 times in 730 days

data loggers maintenance: every 15 days

air inlets maintenance: every 15 days

**Acceptance data criteria:**

1. Span drifts

span drift:  $< \pm 10 \%$  of full scale for NO<sub>2</sub>, SO<sub>2</sub>, CO detectors

span drift:  $< \pm 7 \%$  of full scale O<sub>3</sub> detectors

2. Zero checks

zero drift:  $< \pm 5$  ppb for NO<sub>2</sub>, SO<sub>2</sub> and O<sub>3</sub> detectors

zero drift:  $< \pm 0.4$  ppm for CO detectors

## Section B: Maximum and Average Concentrations of Gaseous Pollutants

**Table S1:** Statistical analysis of the concentrations of gaseous pollutants from the three monitoring station types during 2010 to 2014.

| Monitoring station type | Maximum concentration** (ppb) |             |                 |                 |                | Average concentration*** (ppb) |           |                 |                 |                |
|-------------------------|-------------------------------|-------------|-----------------|-----------------|----------------|--------------------------------|-----------|-----------------|-----------------|----------------|
|                         | CO*                           | NO          | NO <sub>2</sub> | SO <sub>2</sub> | O <sub>3</sub> | CO*                            | NO        | NO <sub>2</sub> | SO <sub>2</sub> | O <sub>3</sub> |
| BKK sites               | 5.7±0.9                       | 419.2±236.0 | 120.5±14.8      | 29.8±5.3        | 153.7±10.8     | 0.7±0.2                        | 16.3±7.8  | 20.2±5.7        | 3.3±1.0         | 18.6±2.3       |
| Roadside sites          | 8.0±0.4                       | 683.0±396.0 | 166.0±19.8      | 26.0±5.7        | 130.5±14.8     | 1.0±0.1                        | 60.5±42.7 | 30.9±8.1        | 2.6±1.0         | 13.9±8.6       |
| BKK suburb sites        | 4.5±1.2                       | 297.5±70.6  | 115.8±15.8      | 72.2±58.3       | 163.0±18.5     | 0.7±0.1                        | 11.4±3.8  | 16.1±2.6        | 4.0±2.3         | 21.4±3.3       |

**Note:** \* in ppm, \*\* 5-year average maximum concentrations ± 1 standard deviation, \*\*\* 5-year average concentration ± 1 standard deviation

### Section S3: Seasonal Variations of Gaseous Criteria Pollutants

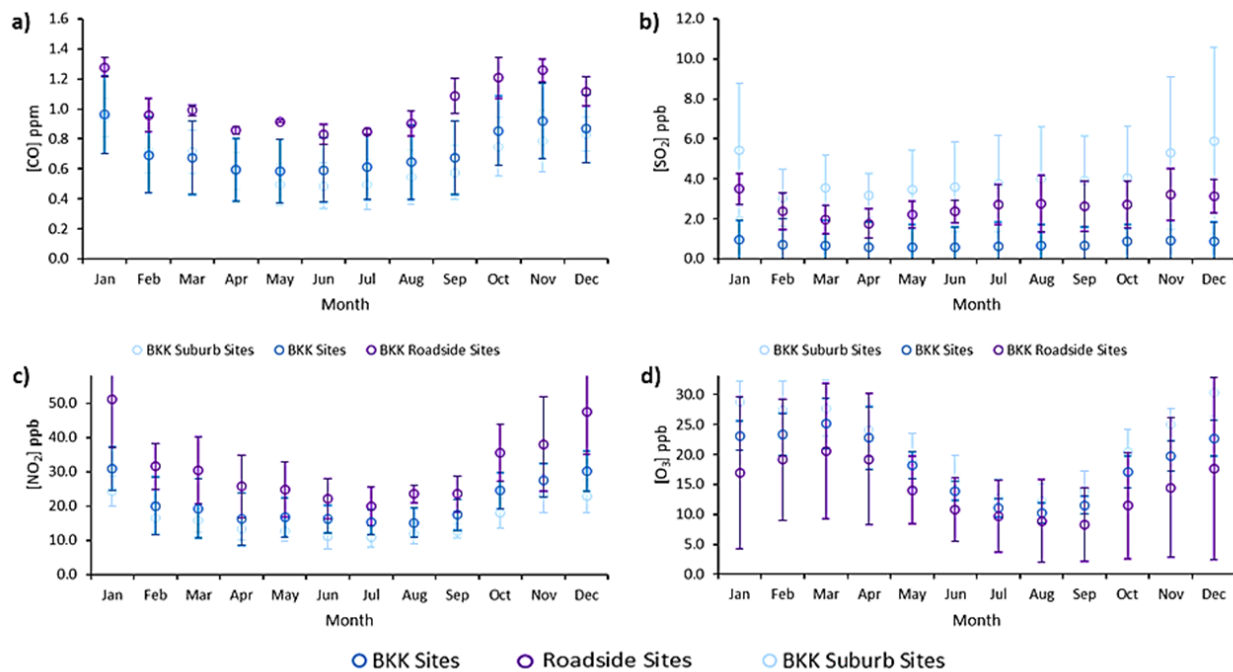

**Figure S2:** Seasonal variations of a) CO b) SO<sub>2</sub> c) NO<sub>2</sub> and d) O<sub>3</sub> from the three monitoring station types during 2010 to 2014. Dots reveal monthly average concentrations; and vertical bars reveal  $\pm 1$  standard deviations of the concentrations.

## Section S4: Inter-annual Variations of Gaseous Pollutants

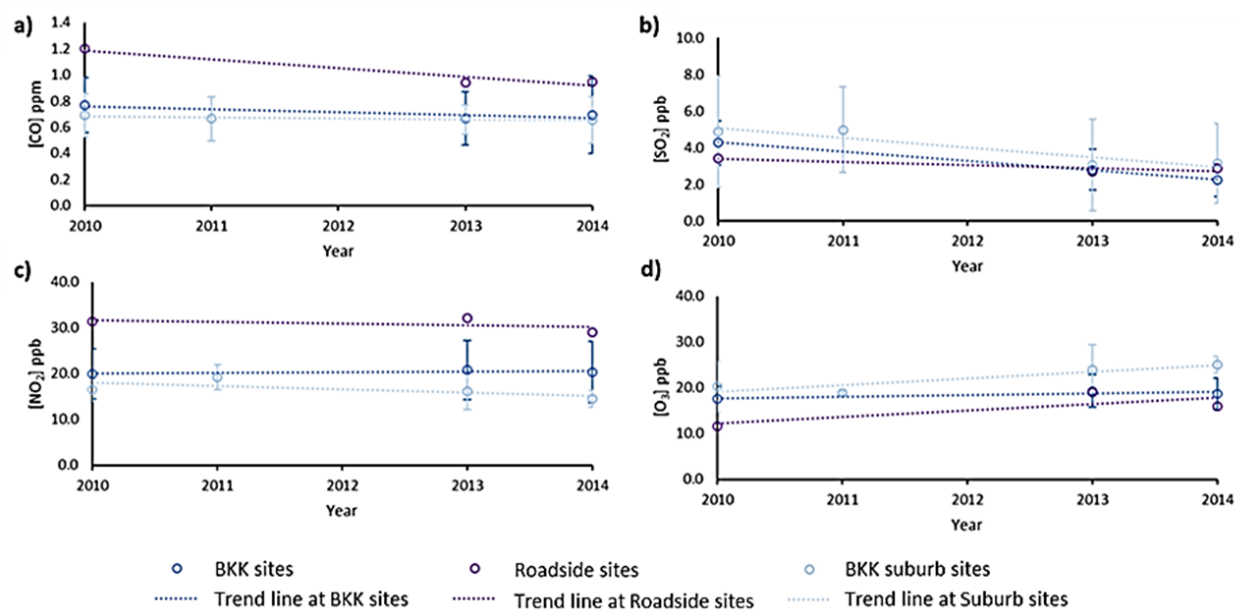

**Figure S3:** Inter-annual variations of a) CO b) SO<sub>2</sub> c) NO<sub>2</sub> and d) O<sub>3</sub> from the three monitoring station types during 2010 to 2014. Dots reveal yearly average concentrations; and vertical bars reveal  $\pm 1$  standard deviations of the concentrations.

## Section S5: Season Wise Distributions of the Diurnal Variations of Gaseous Criteria Pollutants

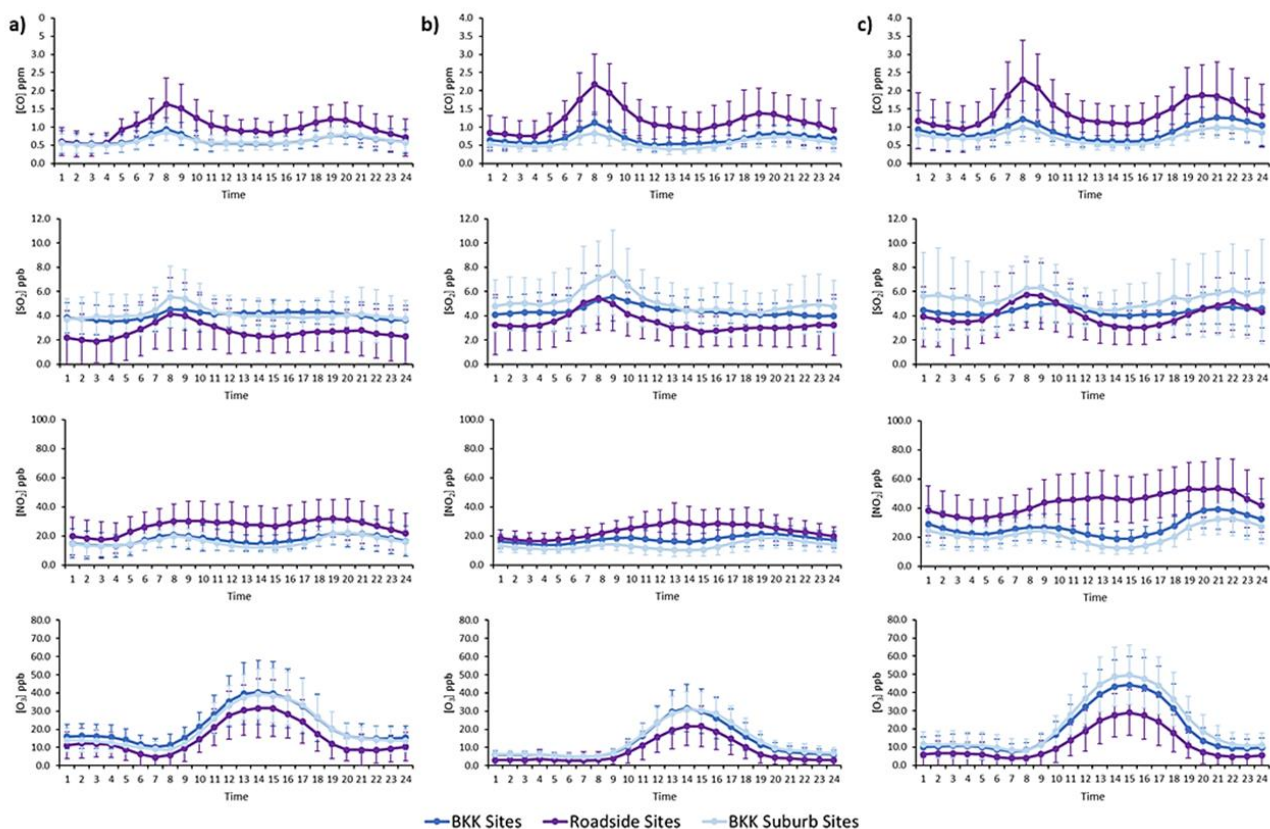

**Figure S4:** Season wise distributions of the diurnal variations of CO, SO<sub>2</sub>, NO<sub>2</sub> and O<sub>3</sub> during local summer (column a)), wet season (column b)) and local winter (column c)) at the three monitoring station types. Vertical bars reveal  $\pm 1$  standard deviations of the concentrations

## Section F: Chemical Rate Coefficients

**Table S2:** Statistical analysis of the chemical rate coefficients ( $j_I$  and  $k_3$ ) based on an observational analysis during dry seasons at BKK sites, roadside and BKK suburb sites, 2010 to 2014.; and statistical analysis of  $j_I$  based on a modeling analysis at the latitude and the longitude of 13.7 °N, 100.5 °E in a dry season, 2010.

| Sites                        | Rate coefficient  |      |          |                 |       |             |                                     |      |          |                                                        |                      |                                            |
|------------------------------|-------------------|------|----------|-----------------|-------|-------------|-------------------------------------|------|----------|--------------------------------------------------------|----------------------|--------------------------------------------|
|                              | $j_I$             |      |          |                 |       |             | $k_3$                               |      |          |                                                        |                      |                                            |
|                              | min <sup>-1</sup> |      |          | s <sup>-1</sup> |       |             | ppm <sup>-1</sup> min <sup>-1</sup> |      |          | cm <sup>3</sup> molecule <sup>-1</sup> s <sup>-1</sup> |                      |                                            |
|                              | Max               | Min  | Average  | Max             | Min   | Average     | Max                                 | Min  | Average  | Max                                                    | Min                  | Average                                    |
| <b>Based on observation*</b> |                   |      |          |                 |       |             |                                     |      |          |                                                        |                      |                                            |
| <i>BKK</i>                   | 0.95              | 0.12 | 0.74±0.2 | 0.016           | 0.004 | 0.008±0.035 | 30.9                                | 28.6 | 29.8±0.7 | 2.06e <sup>-14</sup>                                   | 1.99e <sup>-14</sup> | 2.02e <sup>-14</sup> ±2.01e <sup>-16</sup> |
| <i>Roadside</i>              | 0.90              | 0.36 | 0.64±0.3 | 0.015           | 0.011 | 0.013±0.002 | 30.6                                | 28.3 | 29.7     | 2.03e <sup>-14</sup>                                   | 2.03e <sup>-14</sup> | 2.03e <sup>-14</sup>                       |
| <i>BKK suburb</i>            | 1.22              | 0.34 | 0.55±0.3 | 0.022           | 0.007 | 0.010±0.004 | 30.9                                | 28.8 | 29.8±0.7 | 2.04e <sup>-14</sup>                                   | 2.01e <sup>-14</sup> | 2.03e <sup>-14</sup> ±1.34e <sup>-16</sup> |
| <b>Based on modeling**</b>   |                   |      |          |                 |       |             |                                     |      |          |                                                        |                      |                                            |
| <i>13.7 °N, 100.5 °E</i>     |                   |      |          |                 |       | 0.021±0.002 |                                     |      |          |                                                        |                      |                                            |



## Section G: Correlations between CO and NO<sub>x</sub>; and SO<sub>2</sub> and NO<sub>x</sub>

**Table S3:** Correlations between CO and NO<sub>x</sub>; and SO<sub>2</sub> and NO<sub>x</sub> at BKK sites, roadside sites and suburb sites, during 2010 to 2014; together with  $\pm 1$  standard deviation.

| Station type   | Station ID | Correlation            |                                     |
|----------------|------------|------------------------|-------------------------------------|
|                |            | CO and NO <sub>x</sub> | SO <sub>2</sub> and NO <sub>x</sub> |
| BKK sites      | 3T         | 0.76                   | 0.34                                |
|                | 5T         | 0.56                   | 0.37                                |
|                | 10T        | 0.76                   | 0.36                                |
|                | 11T        | 0.68                   | 0.33                                |
|                | 12T        | 0.61                   | 0.26                                |
|                | 15T        | 0.64                   | 0.29                                |
|                | 61T        | 0.85                   | 0.28                                |
|                | Average    | 0.69 $\pm$ 0.10        | 0.32 $\pm$ 0.04                     |
| Roadside sites | 52T        | 0.73                   | 0.49                                |
|                | 54T        | 0.72                   | 0.56                                |
|                | Average    | 0.72                   | 0.53                                |
| Suburb sites   | 13T        | 0.92                   | 0.32                                |
|                | 14T        | 0.64                   | 0.11                                |
|                | 19T        | 0.47                   | 0.39                                |
|                | 20T        | 0.55                   | 0.21                                |
|                | 22T        | 0.71                   | 0.27                                |
|                | 27T*       | 0.77                   | 0.53                                |
|                | Average    | 0.68 $\pm$ 0.16        | 0.30 $\pm$ 0.15                     |

**Note:** \*the correlations are calculated based observations during 2010 to 2013

## Section S8: AQI O<sub>3</sub> Calculation

To calculate AQI for O<sub>3</sub>, a midpoint of 8-hour average of O<sub>3</sub> concentration is needed. The midpoint of a specific hour is calculated from the average of hourly O<sub>3</sub> concentration of the previous four hours, at the given hour and the following three hours (Fig. V). To get a valid calculation, at least 6 of 8 records (75%), are needed. Calculated AQI values are compared with the AQI table (Fig. VI) (US.EPA, 2017a, 2017b)

| Hours                               | 1                    | 2 | 3 | 4 | 5 | 6   | 7                     | 8 | 9 |
|-------------------------------------|----------------------|---|---|---|---|-----|-----------------------|---|---|
| [O <sub>3</sub> ] <sub>hourly</sub> |                      |   |   |   |   | *   |                       |   |   |
|                                     | The previous 4 hours |   |   |   |   | AQI | The following 3 hours |   |   |

**Figure S5:** The calculation of a midpoint of AQI for O<sub>3</sub> (modified from US.EPA, 2017a)

| Air Quality Index (0-500)                | Who Needs to be Concerned?                                                                                                                  | What Should I Do?                                                                                                                                                                                                                                                                                                                                                                                                                         |
|------------------------------------------|---------------------------------------------------------------------------------------------------------------------------------------------|-------------------------------------------------------------------------------------------------------------------------------------------------------------------------------------------------------------------------------------------------------------------------------------------------------------------------------------------------------------------------------------------------------------------------------------------|
| Good (0-50)                              | It's a great day to be active outside.                                                                                                      |                                                                                                                                                                                                                                                                                                                                                                                                                                           |
| Moderate (51-100)                        | Some people who may be unusually sensitive to ozone.                                                                                        | <p><b>Unusually sensitive people:</b> Consider reducing prolonged or heavy outdoor exertion. Watch for symptoms such as coughing or shortness of breath. These are signs to take it a little easier.</p> <p><b>Everyone else:</b> It's a good day to be active outside.</p>                                                                                                                                                               |
| Unhealthy for Sensitive Groups (101-150) | Sensitive groups include people with lung disease such as asthma, older adults, children and teenagers, and people who are active outdoors. | <p><b>Sensitive groups:</b> Reduce prolonged or heavy outdoor exertion. Take more breaks, do less intense activities. Watch for symptoms such as coughing or shortness of breath. Schedule outdoor activities in the morning when ozone is lower.</p> <p><b>People with asthma</b> should follow their asthma action plans and keep quick relief medicine handy.</p>                                                                      |
| Unhealthy (151 to 200)                   | Everyone                                                                                                                                    | <p><b>Sensitive groups:</b> Avoid prolonged or heavy outdoor exertion. Schedule outdoor activities in the morning when ozone is lower. Consider moving activities indoors.</p> <p><b>People with asthma,</b> keep quick-relief medicine handy.</p> <p><b>Everyone else:</b> Reduce prolonged or heavy outdoor exertion. Take more breaks, do less intense activities. Schedule outdoor activities in the morning when ozone is lower.</p> |
| Very Unhealthy (201-300)                 | Everyone                                                                                                                                    | <p><b>Sensitive groups:</b> Avoid all physical activity outdoors. Move activities indoors or reschedule to a time when air quality is better.</p> <p><b>People with asthma,</b> keep quick-relief medicine handy.</p> <p><b>Everyone else:</b> Avoid prolonged or heavy outdoor exertion. Schedule outdoor activities in the morning when ozone is lower. Consider moving activities indoors.</p>                                         |
| Hazardous (301-500)                      | Everyone                                                                                                                                    | <b>Everyone:</b> Avoid all physical activity outdoors.                                                                                                                                                                                                                                                                                                                                                                                    |

**Figure S6:** The AQI (US.EPA, 2017b)
